# Supplementary material for: Cardiovascular and non-cardiovascular hospital admissions associated with atrial fibrillation: a Danish nationwide, retrospective cohort study
Source: HighWire-hosted journal article supplement (doi:10.1136/bmjopen-2012-001800), 2013-01-01

Supplementary. Figure 4. Readmissions for AF and cardiovascular (CV) admissions for male patients with or without atrial fibrillation. Stratified for age. Data shown as admission type per 100 person-years.

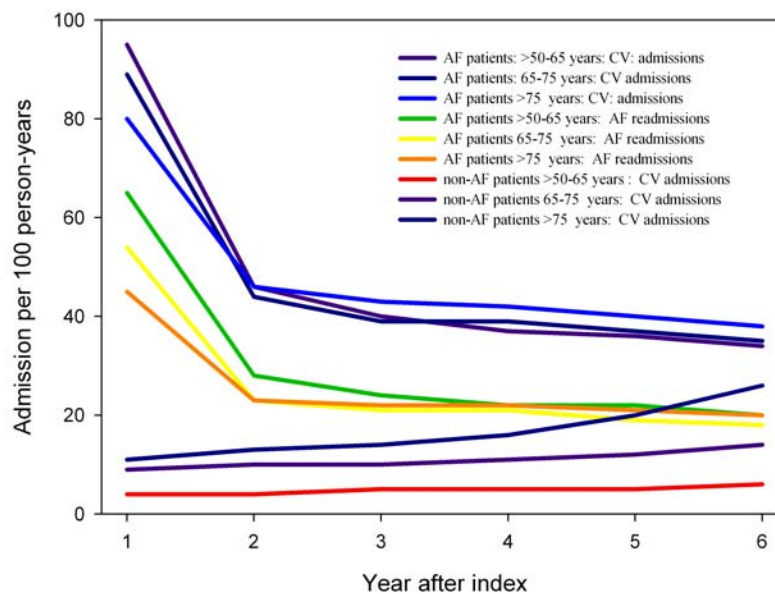

Supplement: bmjopen-2012-001800supp_figure4.pdf [file bmjopen-2012-001800supp_figure4.pdf]
