# Supplementary material for: Cardiovascular and non-cardiovascular hospital admissions associated with atrial fibrillation: a Danish nationwide, retrospective cohort study
Source: HighWire-hosted journal article supplement (doi:10.1136/bmjopen-2012-001800), 2013-01-01

Supplementary. Figure 5.  
 Noncardiovascular admissions for male patients according to  
 AF. Data shown as admissions per 100 person-years.  
 Stratified for age.

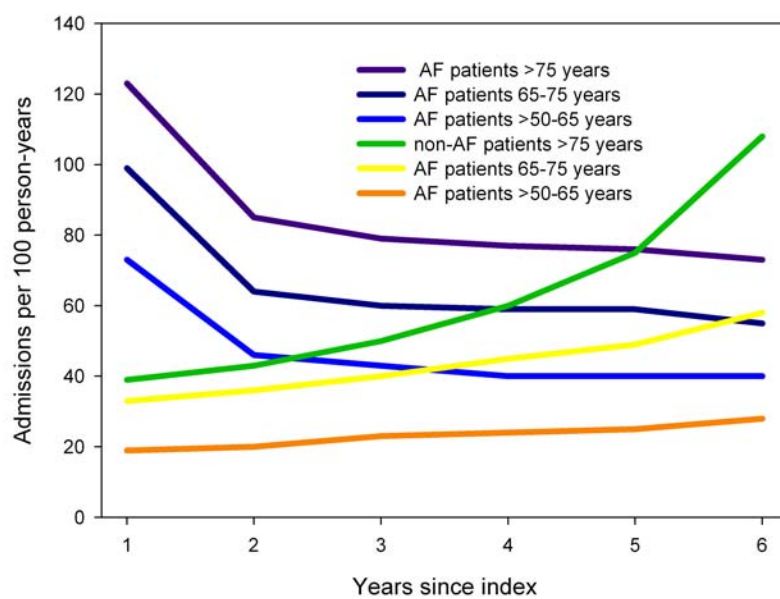

Supplement: bmjopen-2012-001800supp_figure5.pdf [file bmjopen-2012-001800supp_figure5.pdf]
