# Supplementary material for: Cardiovascular and non-cardiovascular hospital admissions associated with atrial fibrillation: a Danish nationwide, retrospective cohort study
Source: HighWire-hosted journal article supplement (doi:10.1136/bmjopen-2012-001800), 2013-01-01

Supplementary. Figure 6.  
 Readmissions for AF and cardiovascular admissions for women  
 according to atrial fibrillation. Stratified for age.  
 Data shown as admission type per 100 person-years.

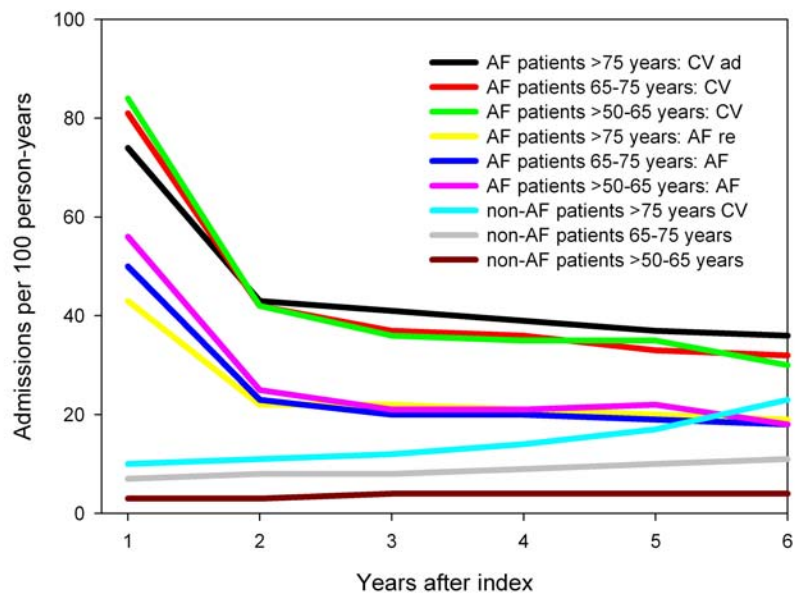

Supplement: bmjopen-2012-001800supp_figure6.pdf [file bmjopen-2012-001800supp_figure6.pdf]
