# Supplementary material for: Cardiovascular and non-cardiovascular hospital admissions associated with atrial fibrillation: a Danish nationwide, retrospective cohort study
Source: HighWire-hosted journal article supplement (doi:10.1136/bmjopen-2012-001800), 2013-01-01

Supplementary. Figure 7.

Noncardiovascular admissions for female patients according to atrial fibrillation. Stratified for age. Data shown as admissions per 100 person-years.

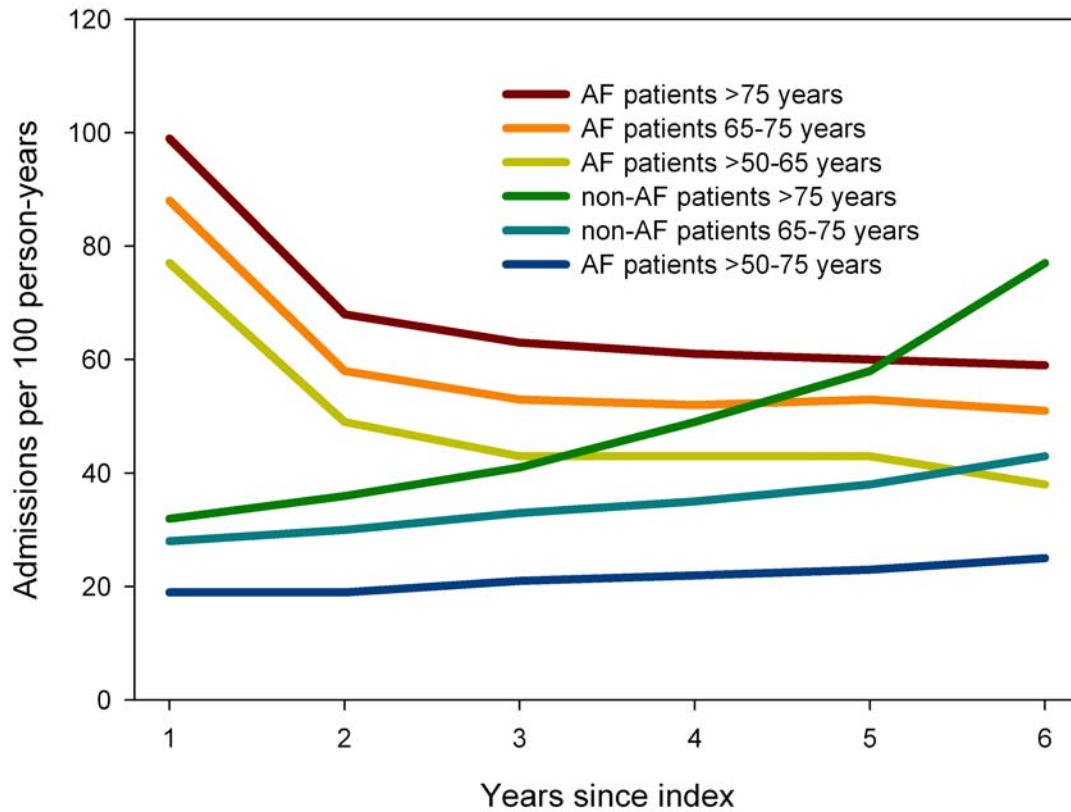

Supplement: bmjopen-2012-001800supp_figure7.pdf [file bmjopen-2012-001800supp_figure7.pdf]
